# Supplementary material for: Effective isolation of succinic acid from aqueous media with the use of anion exchange resins
Source: Royal Society of Chemistry journal article supplement (doi:10.1039/d4ra02110j), 2024-01-01
Supplement: d4ra02110j1.pdf [file d4ra02110j1.pdf]

## **Effective Isolation of Succinic Acid from Aqueous Media with the Use of Anion Exchange Resins**

Hamayoun Asim<sup>1,2</sup>, Hani Zeidan<sup>1</sup>, Mustafa Esen Marti<sup>1,\*</sup>

<sup>1</sup>Department of Chemical Engineering, Konya Technical University, Konya, Turkey

<sup>2</sup>Department of Chemical Engineering, Selçuk University, Konya, Turkey

\*Corresponding author:

Prof. Dr. Mustafa Esen Marti (e-mail: [memarti@ktun.edu.tr](mailto:memarti@ktun.edu.tr), [mustafaesenmarti@gmail.com](mailto:mustafaesenmarti@gmail.com))  
Address: Konya Technical University Phone: +90-332-223-1837 Fax: +90-332-241-0635

### **SUPPORTING INFORMATION**

**Table S1.** The general properties of anion exchange resins used in the study.

| <b>General properties</b> | <b>Lewatit<br/>MP-62</b>        | <b>Lewatit<br/>MP-64</b>          | <b>Lewatit<br/>M-500</b>        | <b>Lewatit<br/>M-600</b>         |
|---------------------------|---------------------------------|-----------------------------------|---------------------------------|----------------------------------|
| Type                      | weak basic                      | weak basic                        | strong basic                    | strong basic                     |
| Ionic form                | free base                       | free base                         | Cl <sup>-</sup>                 | Cl <sup>-</sup>                  |
| Functional group          | tertiary<br>amine               | tertiary &<br>quaternary<br>amine | quaternary<br>amine<br>(Type I) | quaternary<br>amine<br>(Type II) |
| Matrix structure          | cross-<br>linked<br>polystyrene | cross-<br>linked<br>polystyrene   | cross-<br>linked<br>polystyrene | cross-<br>linked<br>polystyrene  |
| Appearance                | beige,<br>opaque                | beige,<br>opaque                  | yellow,<br>translucent          | white,<br>translucent            |
| Maximum temperature (°C)  | 130                             | 70                                | 70                              | 30                               |
| Operating pH range        | 0-8                             | 0-7                               | 0-12                            | 0-11                             |
| Density (g/mL)            | 1.02                            | 1.04                              | 1.08                            | 1.10                             |
| Total capacity (eq/L)     | 1.7                             | 1.3                               | 1.3                             | 1.3                              |

**Table S2.** Non-linear and linear equations of the kinetic models studied.

| <b>Kinetic model</b>    | <b>Non-linear equation</b>                | <b>Linear equation</b>                                              | <b>Plot</b>               |
|-------------------------|-------------------------------------------|---------------------------------------------------------------------|---------------------------|
| Pseudo-first-order      | $dq_t/dt = k_1 \cdot (q_e - q_t)$         | $\log (q_e - q_t) = \log q_e$                                       | $\log (q_e - q_t)$ vs $t$ |
| Pseudo-second-order     | $dq_t/dt = k_2 \cdot (q_e - q_t)^2$       | $\frac{t}{q_t} = \frac{1}{k_2 q_e^2} + \frac{1}{q_e} \cdot t$       | $t/q_t$ vs $t$            |
| Elovich                 | $dq_t/dt = \alpha \cdot \exp(-\beta q_t)$ | $q_t = \frac{\ln(\alpha \cdot \beta)}{\beta} + \frac{\ln t}{\beta}$ | $q_t$ vs $\ln t$          |
| Intraparticle diffusion | ---                                       | $q_t = k_{id} \cdot t^{0.5} + I$                                    | $q_t$ vs $t^{0.5}$        |

**Table S3.** The linear equations of the isotherm models studied.

| <b>Model name</b> | <b>Linear equation</b>                                                                                            | <b>Plot</b>                                      |
|-------------------|-------------------------------------------------------------------------------------------------------------------|--------------------------------------------------|
| Langmuir          | $\frac{1}{q_e} = \frac{1}{q_{\max} K_L} \cdot \frac{1}{C_e} + \frac{1}{q_{\max}}$ $R_L = 1/(1 + (K_L \cdot C_o))$ | 1/q <sub>e</sub> vs 1/C <sub>e</sub>             |
| Freundlich        | $\log q_e = \frac{1}{n} \cdot \log C_e + \log K$                                                                  | log q <sub>e</sub> vs log C <sub>e</sub>         |
| Temkin            | $q_e = B \cdot \ln K_T + B \cdot \ln C$                                                                           | q <sub>e</sub> vs ln C <sub>e</sub>              |
| Scatchard         | $\frac{q_e}{C_e} = q_{\max} \cdot K_S - K_S \cdot q_e$                                                            | q <sub>e</sub> /C <sub>e</sub> vs q <sub>e</sub> |

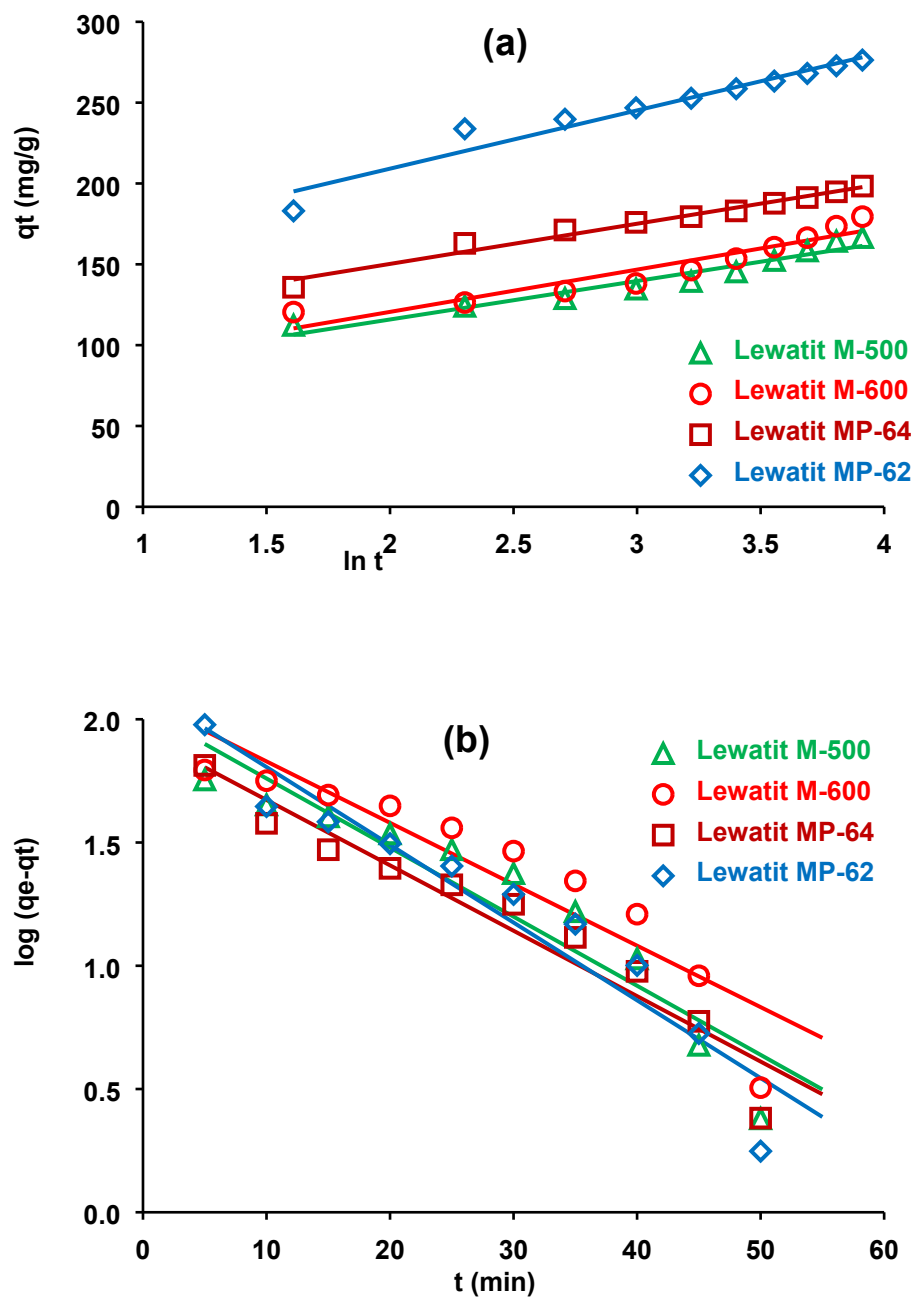

**Fig. S1** The plots of the kinetic analysis for the isolation of SA using anion exchange resins  
 a) Elovich kinetic model b) Pseudo-first order kinetic model
